# Supplementary material for: Quasi-Solid-State SiO2 Electrolyte Prepared from Raw Fly Ash for Enhanced Solar Energy Conversion
Source: MDPI journal article supplement (doi:10.3390/ma15103576), 2022-05-17
Supplement: s1 [file s1]

# Quasi-Solid-State $\text{SiO}_2$ Electrolyte Prepared from Raw Fly Ash for Enhanced Solar Energy Conversion

Gyo Hun Choi <sup>1,†</sup>, Jaehyeong Park <sup>2,3,†</sup>, Sungjun Bae <sup>2,\*</sup> and Jung Tae Park <sup>1,\*</sup>

<sup>1</sup> Department of Chemical Engineering, Konkuk University, 120 Neungdong-ro, Gwangjin-gu, Seoul 05029, Korea

<sup>2</sup> Department of Civil and Environmental Engineering, Konkuk University, 120 Neungdong-ro, Gwangjin-gu, Seoul 05029, Korea

<sup>3</sup> Department of Civil and Environmental Engineering and Institute of Construction and Environmental Engineering, Seoul National University, Gwanak-ro, Gwanak-gu, Seoul 08826, Korea

\* Correspondence: bsj1003@konkuk.ac.kr (S.B.); jtpark25@konkuk.ac.kr (J.T.P.); Tel.: +82-2-450-3904 (S.B.); +82-2-450-3538 (J.T.P.)

† These authors contributed equally to this work.

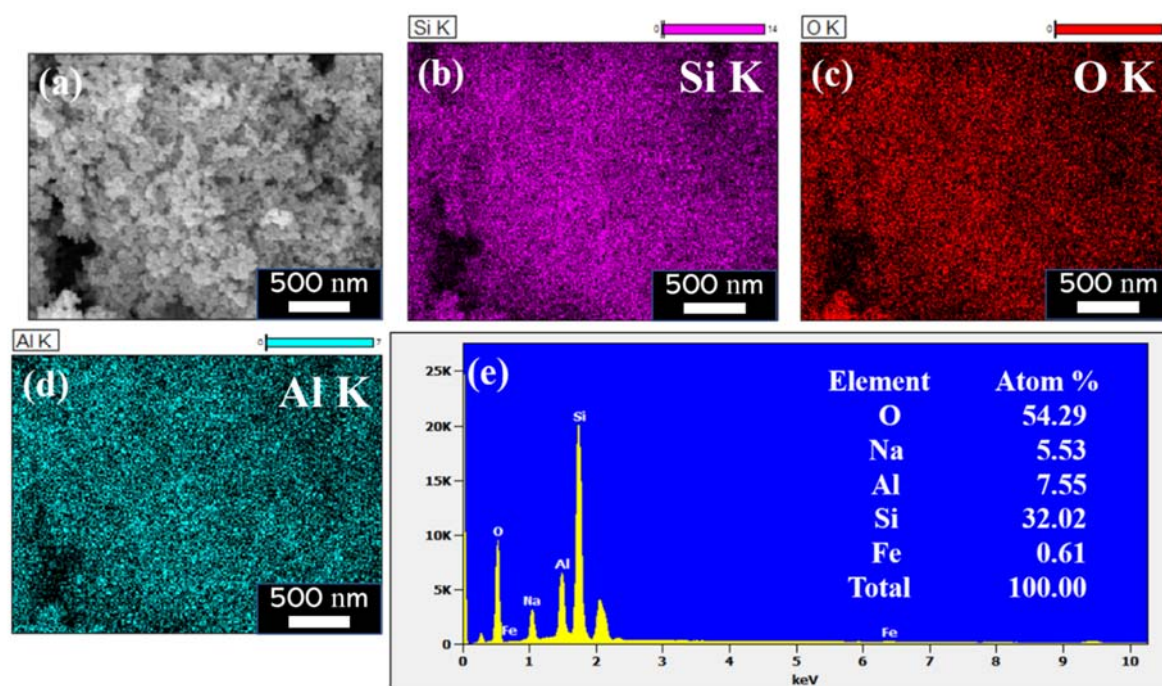

Figure S1. EDS analysis of the prepared FA\_  $\text{SiO}_2$ .

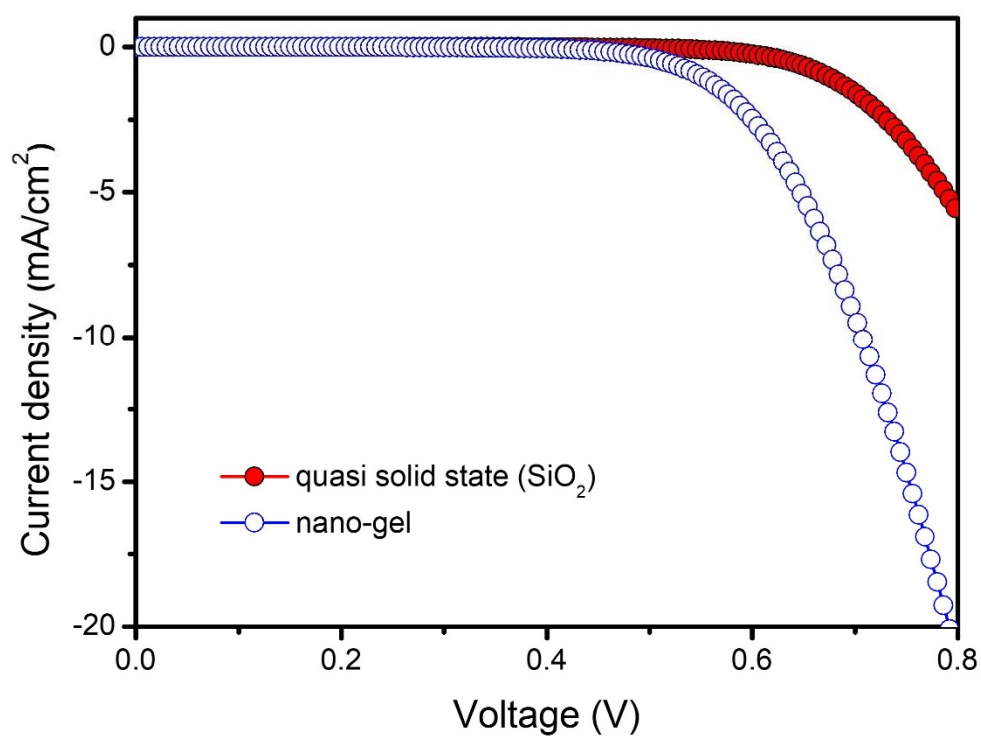

**Figure S2.** Photocurrent density-photovoltaic curves in the dark for DSSCs based on nano-gel and quasi solid state ( $\text{SiO}_2$ ) electrolytes.

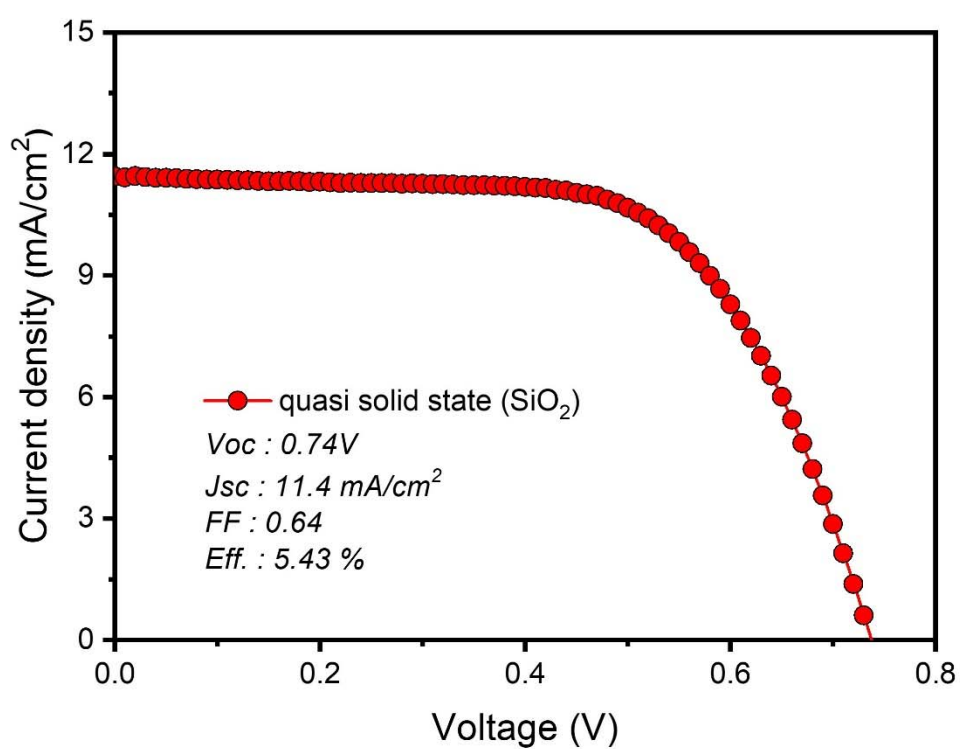

**Figure S3.** Photocurrent density-photovoltaic curves of DSSCs based quasi solid state ( $\text{SiO}_2$ ) electrolytes at  $100 \text{ mW cm}^{-2}$  from different batches. Different cells were made for reliability test.

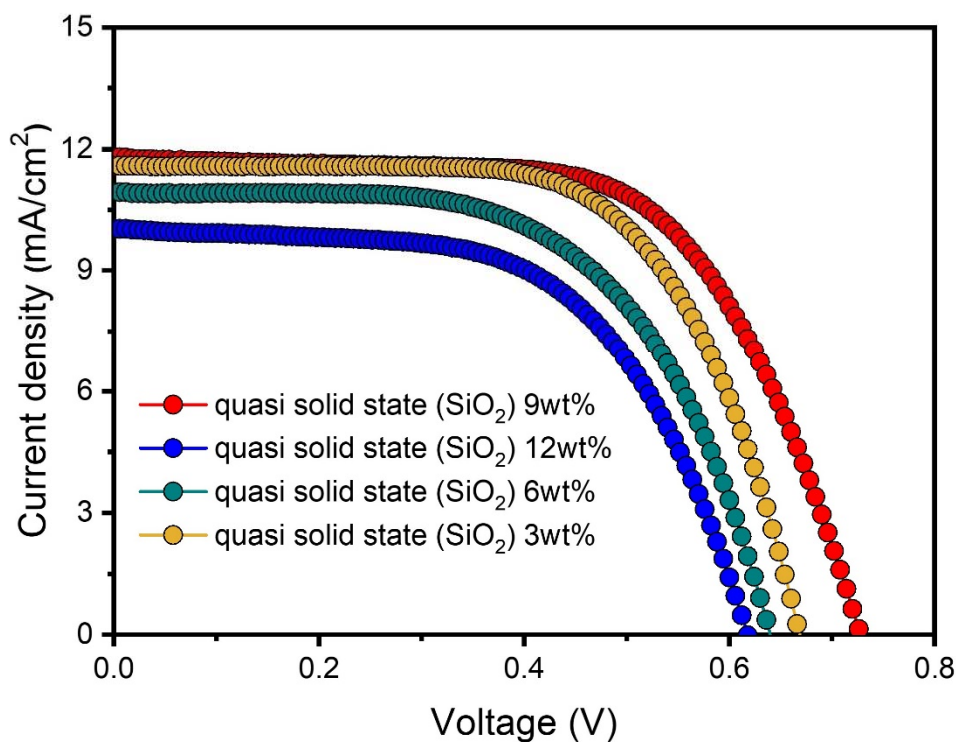

**Figure S4.** Photocurrent density-photovoltaic curves of DSSCs based on quasi solid state ( $\text{SiO}_2$ ) electrolytes with different FA\_ $\text{SiO}_2$  content at  $100 \text{ mW cm}^{-2}$ .

**Table S1.** DSSCs electrolyte formulations.

| Electrolyte                          | FA_ $\text{SiO}_2$ | PEG  | LiI    | MPII   | $\text{I}_2$ | Acetonitrile |
|--------------------------------------|--------------------|------|--------|--------|--------------|--------------|
| Nano-gel                             | -                  | 1 g  | 0.15 g | 0.15 g | 0.03 g       | 10 ml        |
| Quasi solid state ( $\text{SiO}_2$ ) | 0.09 g             | 1 ml | 0.15g  | 0.15 g | 0.03 g       | 10 ml        |

**Table S2.** Comparison of photovoltaic parameters of DSSCs fabricated with quasi solid state electrolytes reported in the literature.

| Quasi solid state electrolyte | $V_{oc}$ (V) | $J_{sc}$ ( $\text{mA/cm}^2$ ) | $FF$ | $\eta$ (%) | Reference |
|-------------------------------|--------------|-------------------------------|------|------------|-----------|
| FA_ $\text{SiO}_2$            | 0.73         | 12.1                          | 0.62 | 5.5        | This work |
| $\text{ZrO}_2$ -C/PGEs        | 0.66         | 14.0                          | 0.61 | 5.6        | [41]      |
| PHS                           | 0.56         | 8.69                          | 0.70 | 3.4        | [42]      |
| PGMA/PIN                      | 0.84         | 20.37                         | 0.47 | 8.0        | [43]      |
| P3/ES                         | 0.51         | 4.8                           | 0.62 | 1.5        | [44]      |
| P- $\text{WO}_3$              | 0.71         | 14.6                          | 0.61 | 6.3        | [45]      |

**Table S3.** Photovoltaic properties of DSSCs based on quasi solid state (SiO<sub>2</sub>) electrolytes with different FA\_SiO<sub>2</sub> contents under 1 sun illumination. (AM 1.5 G, 100 mW/cm<sup>2</sup>).

|                                             | <i>V<sub>oc</sub></i> (V) | <i>J<sub>sc</sub></i> (mA/cm <sup>2</sup> ) | <i>FF</i> | <i>η</i> (%) |
|---------------------------------------------|---------------------------|---------------------------------------------|-----------|--------------|
| Quasi solid state (SiO <sub>2</sub> ) 3wt%  | 0.67                      | 11.6                                        | 0.65      | 5.0          |
| Quasi solid state (SiO <sub>2</sub> ) 6wt%  | 0.64                      | 10.9                                        | 0.60      | 4.2          |
| Quasi solid state (SiO <sub>2</sub> ) 9wt%  | 0.73                      | 12.1                                        | 0.62      | 5.5          |
| Quasi solid state (SiO <sub>2</sub> ) 12wt% | 0.62                      | 10.0                                        | 0.60      | 3.7          |
